# Supplementary material for: Bioisosteric OH- to SH-replacement changes the antioxidant profile of ferulic acid
Source: Royal Society of Chemistry journal article supplement (doi:10.1039/c9ob01875a), 2019-01-01
Supplement: c9ob01875a1.pdf [file c9ob01875a1.pdf]

## Electronic Supplementary Information

### Bioisosteric OH- to SH- replacement changes the antioxidant profile of ferulic acid

Daniel Chavarria,<sup>a,b†</sup> Carlos Fernandes,<sup>a†</sup> Tiago Silva,<sup>a,b</sup> Jorge Garrido,<sup>c</sup> Fernando Remião,<sup>d</sup> Paulo J. Oliveira<sup>b</sup> and Fernanda Borges<sup>a\*</sup>

<sup>a</sup> CIQUP/Department of Chemistry and Biochemistry, Faculty of Sciences, University of Porto, 4169-007 Porto, Portugal

<sup>b</sup> CNC - Center for Neuroscience and Cell Biology, University of Coimbra, UC Biotech, Biocant Park, Cantanhede, Portugal.

<sup>c</sup> Department of Chemical Engineering, School of Engineering (ISEP), Polytechnic of Porto, 4200-072 Porto, Portugal

<sup>d</sup> UCIBIO-REQUIMTE, Laboratory of Toxicology, Department of Biological Sciences, Faculty of Pharmacy, University of Porto, Porto, Portugal

† These authors contributed equally to this work.

\* Corresponding Author:

Fernanda Borges, CIQUP/Department of Chemistry and Biochemistry, Faculty of Sciences, University of Porto, Porto 4169-007, Portugal. E-mail: [fborges@fc.up.pt](mailto:fborges@fc.up.pt)

## Additional figures

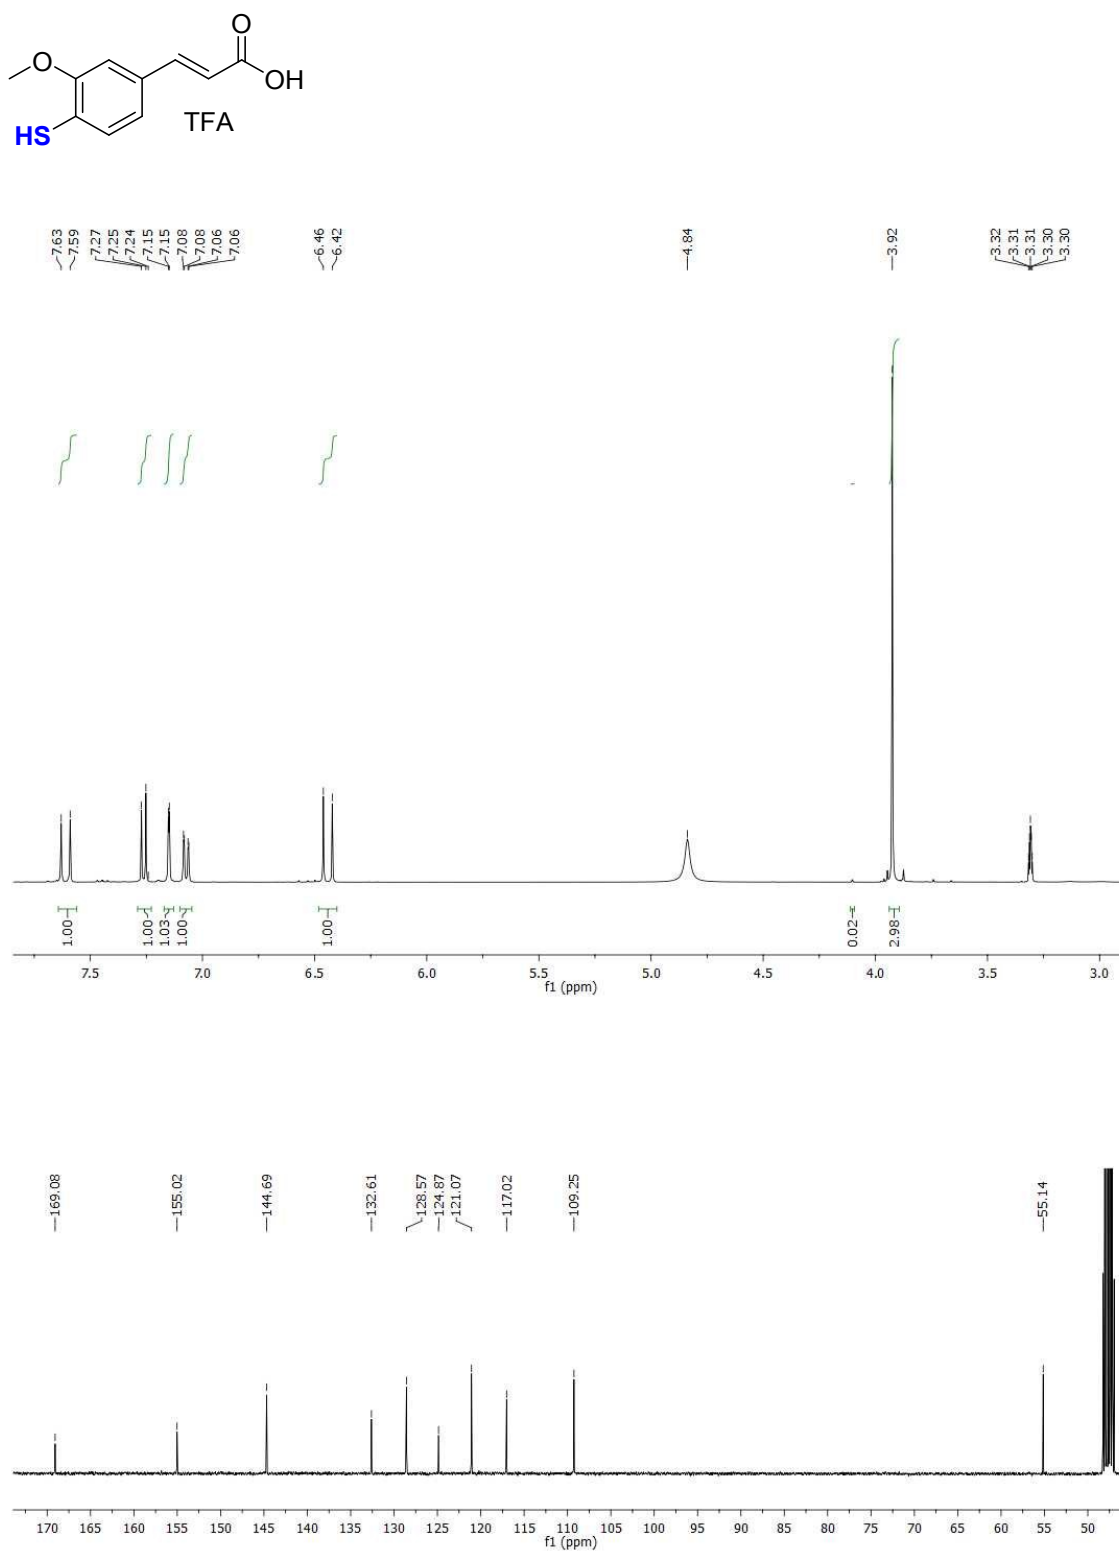

**Figure S1.** <sup>1</sup>H and <sup>13</sup>C NMR spectra of TFA (NMR spectra obtained in MeOD-*d*<sub>4</sub>)

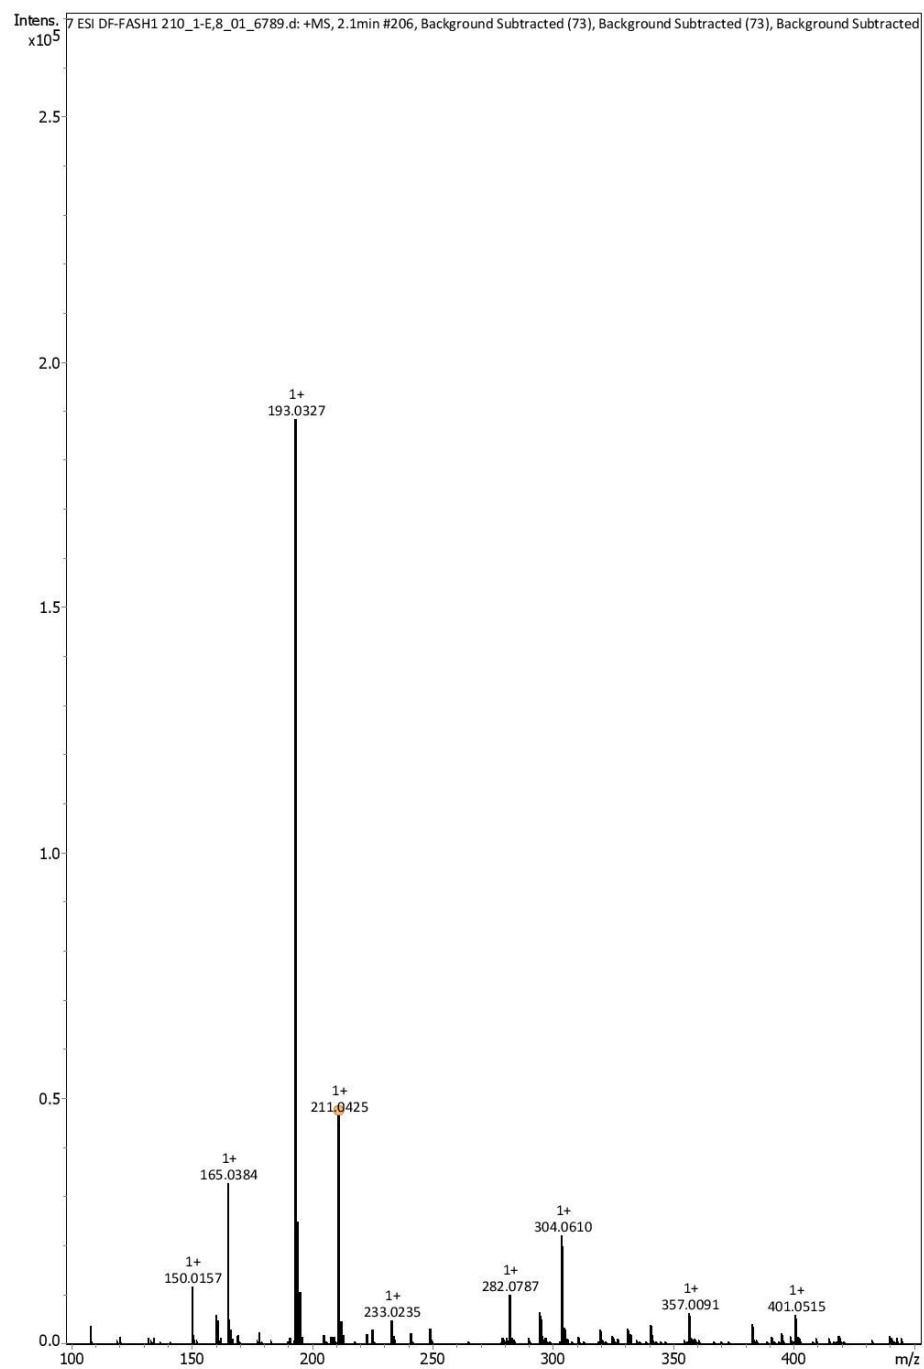

**Figure S2.** ESI-FIA-TOFspectrum of TFA.

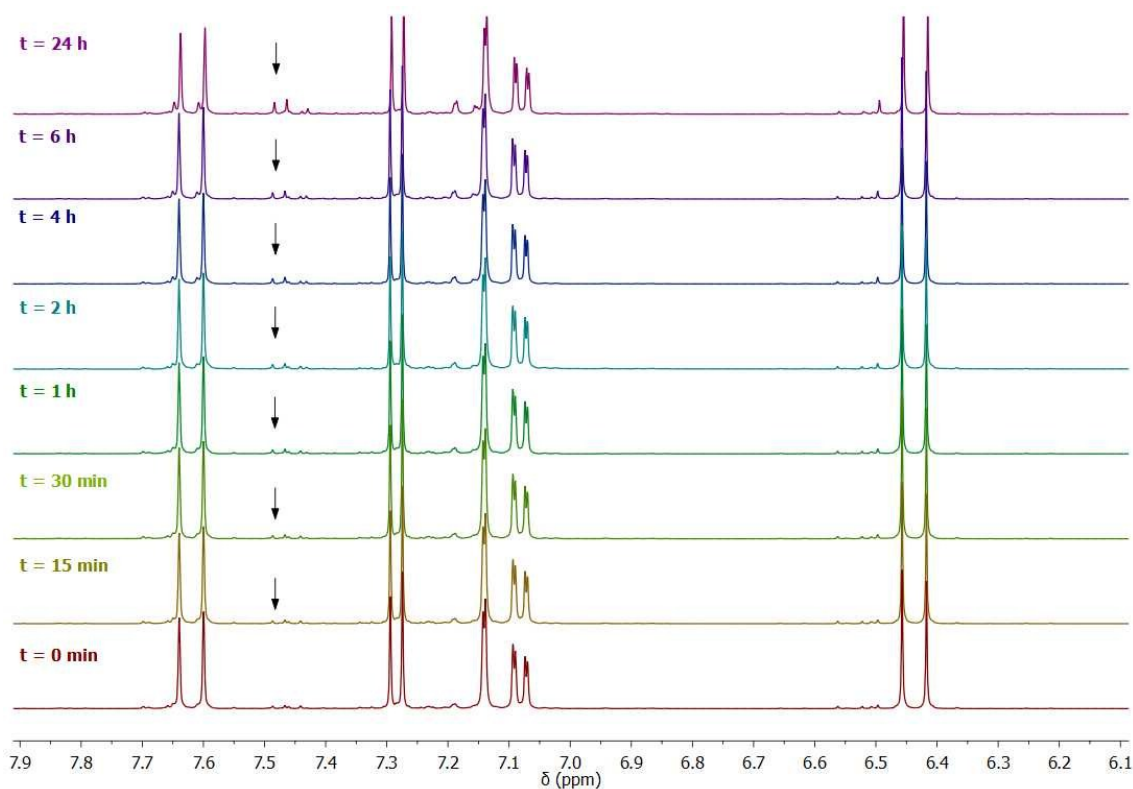

**Figure S3:** Expansion of the  $^1\text{H}$  NMR spectra of TFA in ethanol- $d_6$  obtained at different timepoints (0 – 24 h).

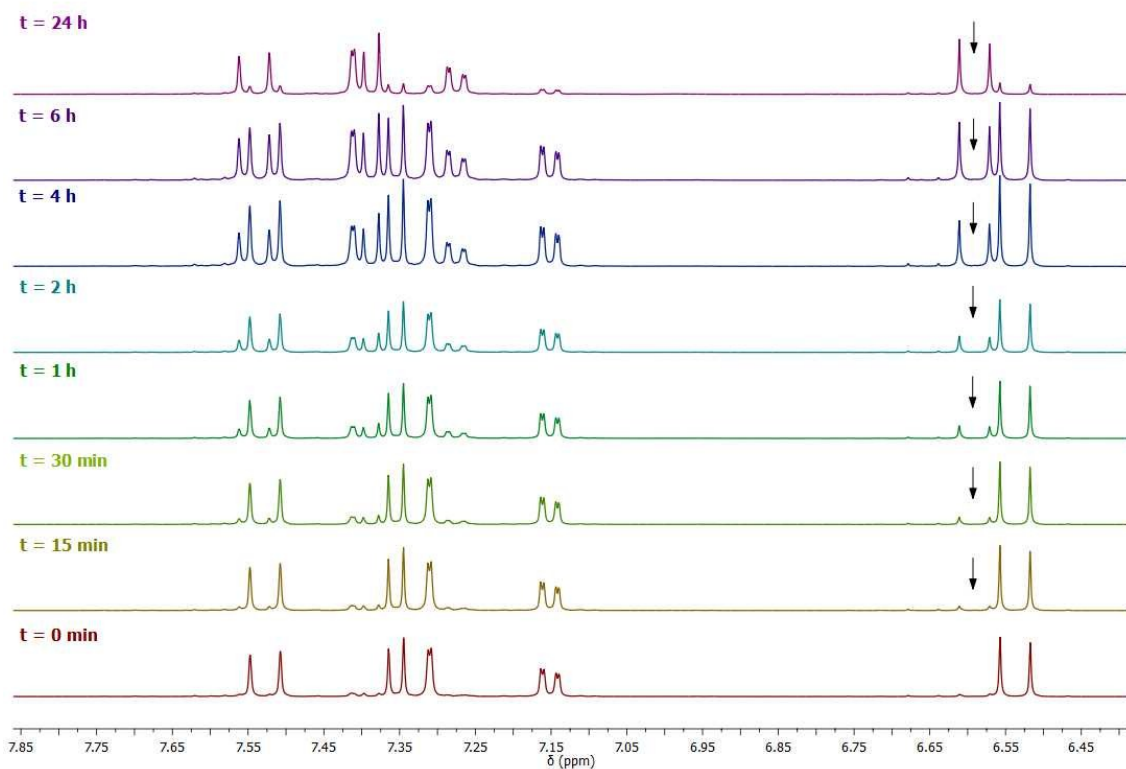

**Figure S4.** Expansion of the  $^1\text{H}$  NMR spectra of TFA in DMSO- $d_6$  obtained at different timepoints (0 – 24 h).

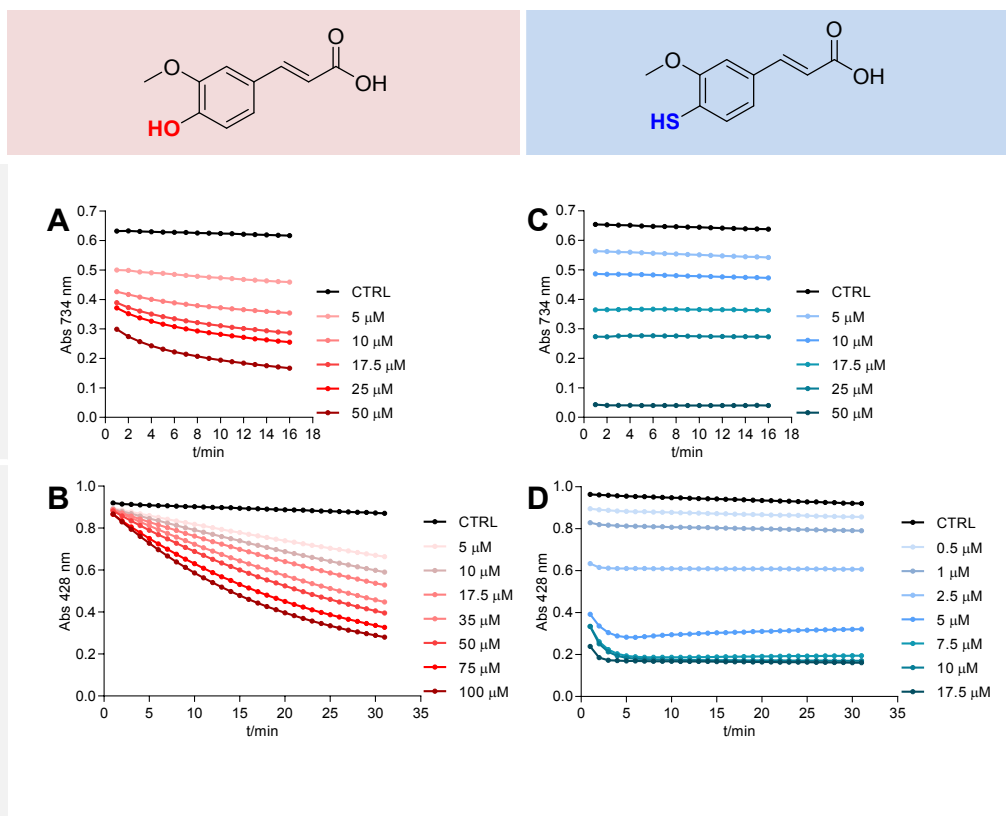

**Figure S5:** Kinetic curves obtained in the presence of increasing concentrations of FA (**A** and **B**) and TFA (**C** and **D**) in ABTS<sup>•+</sup> and GO<sup>•</sup> assays.
